# Supplementary material for: Introduction of peripheral nitrogen atoms to cyclo-meta-phenylenes
Source: publisher site journal article supplement (doi:10.3762/bjoc.20.103), 2024-05-24
Supplement: Additional file 1 [file 1860-5397-20-103-S1.pdf]

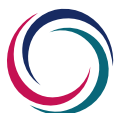

## Supporting Information

for

### Introduction of peripheral nitrogen atoms to cyclo-*meta*-phenylenes

Koki Ikemoto and Hiroyuki Isobe

*Beilstein J. Org. Chem.* **2024**, *20*, 1207–1212. [doi:10.3762/bjoc.20.103](https://doi.org/10.3762/bjoc.20.103)

### Experimental and copies of spectra

## Table of contents

|                                |     |
|--------------------------------|-----|
| Supplementary data.....        | S2  |
| Methods.....                   | S4  |
| <i>Materials</i> .....         | S4  |
| <i>Crystallography</i> .....   | S4  |
| Spectra.....                   | S10 |
| Supplementary references ..... | S14 |

## Supplementary data

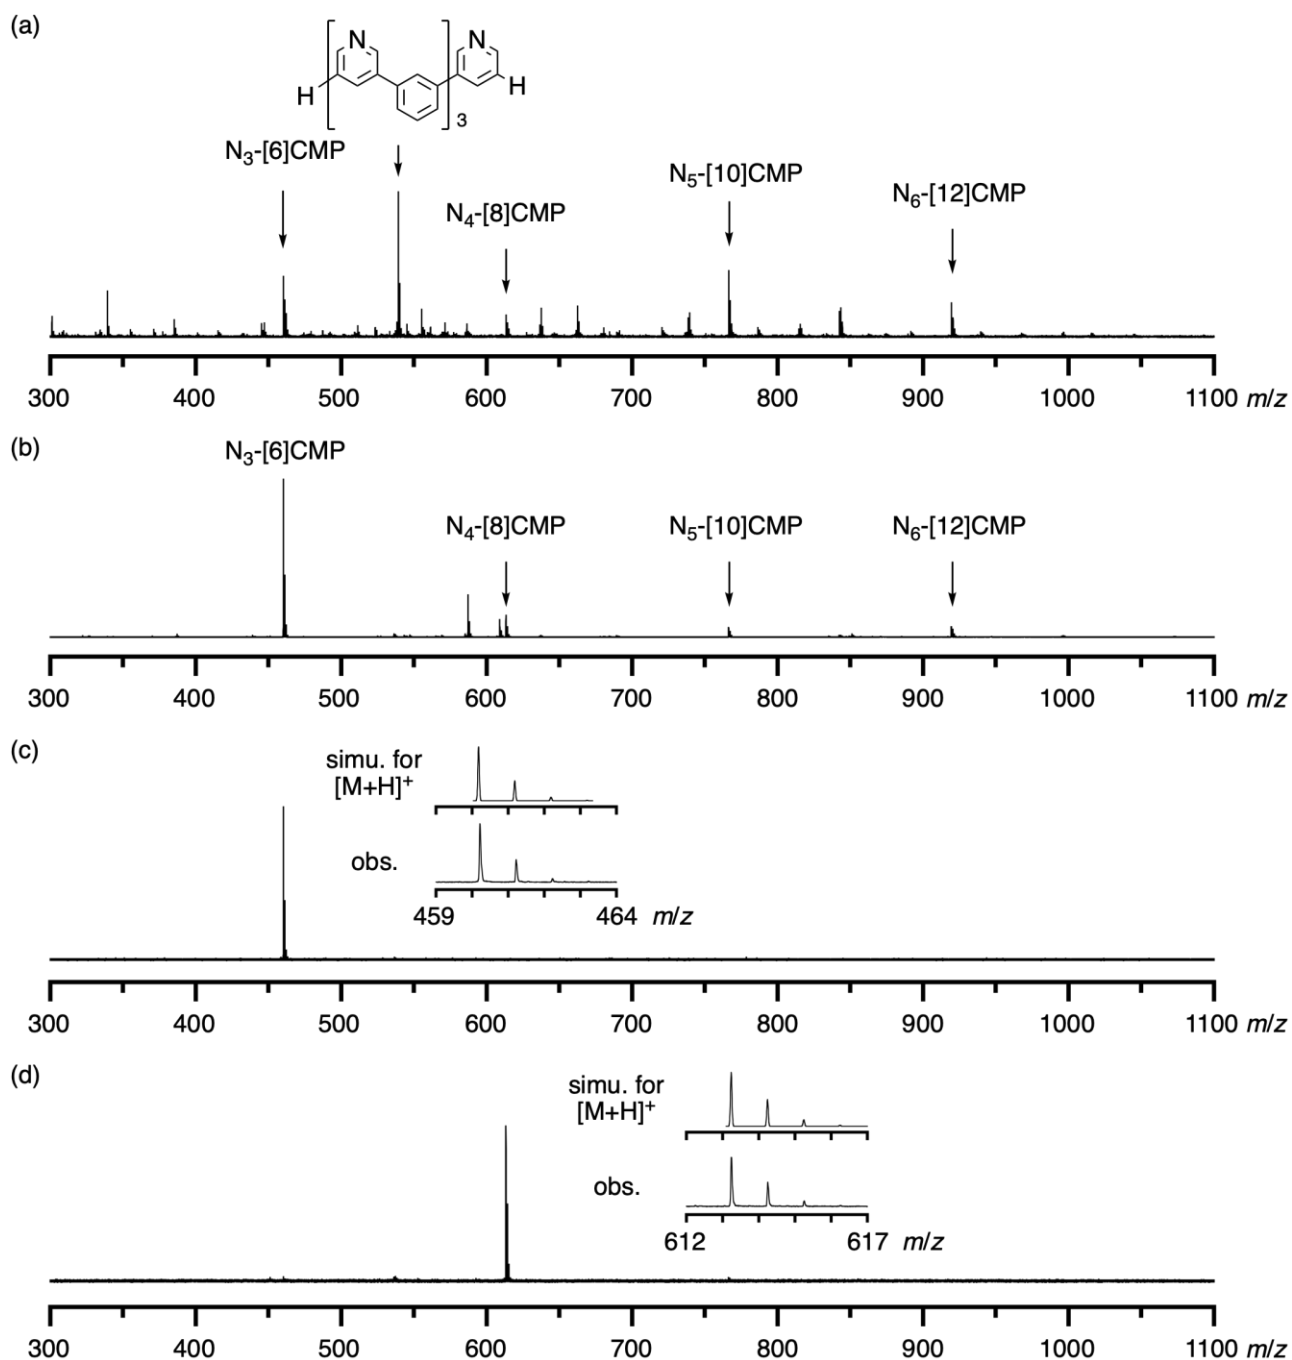

**Figure S1:** MALDI-TOF MS analyses (matrix: dithranol, ionization: reflector positive). Spectra of crude mixtures obtained by using (a)  $\text{Pd}(\text{PPh}_3)_4$  and (b)  $\text{PdCl}_2(\text{dppf})\cdot\text{CH}_2\text{Cl}_2$  as a catalyst. Spectra of (c)  $\text{N}_3$ -[6]CMP (**3a**) and (d)  $\text{N}_4$ -[8]CMP (**3b**) after the purification.

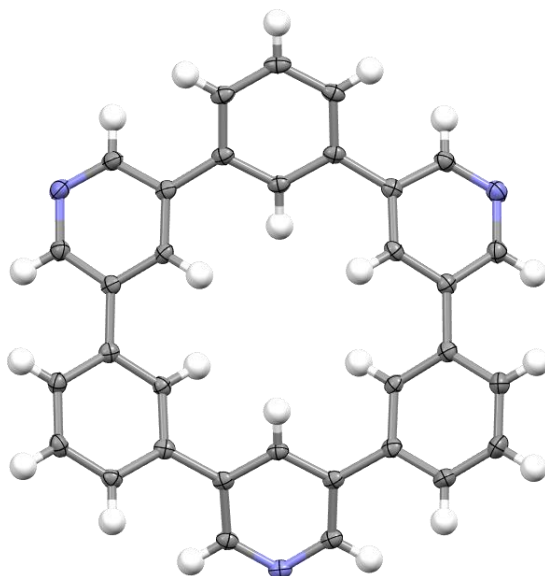

**Figure S2:** ORTEP diagram of a crystal structure of N<sub>3</sub>-[6]CMP (**3a**). Thermal ellipsoids are shown at the 50% probability level.

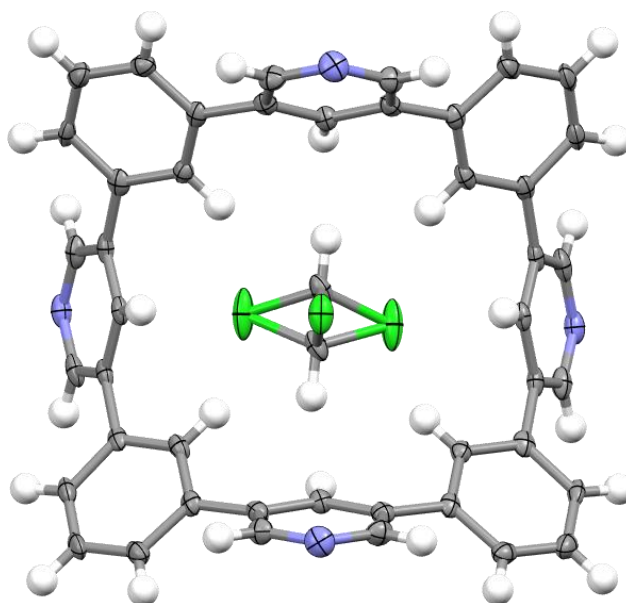

**Figure S3:** ORTEP diagram of a crystal structure of N<sub>4</sub>-[8]CMP (**3b**). Thermal ellipsoids are shown at the 50% probability level.

## Methods

### *General*

Flash silica gel column chromatography was performed on silica gel 60N (spherical and neutral gel, 40–50  $\mu\text{m}$ , Kanto).  $^1\text{H}$  and  $^{13}\text{C}$  NMR spectra were recorded on a JEOL RESONANCE JNM-ECA II 600 equipped with an UltraCOOL probe. Chemical shift values are given relative to an internal tetramethylsilane. Data are reported as follows: chemical shift, multiplicity, coupling constant in Hz and the relative integration value. High-resolution mass spectra were performed on a Bruker Daltonics autoflex speed using matrix assisted laser desorption ionization (MALDI) method with dithranol as a matrix (ionization mode: reflector positive) or on a Bruker micrOTOF II spectrometer equipped with an APCI probe equipped with a DirectProbe (DIP). UV–vis spectra were recorded at 25  $^\circ\text{C}$  on a JASCO V670 spectrometer.

### *Materials*

Anhydrous DMF was purified by a solvent purification system (GlassContour) equipped with columns of activated alumina and supported copper catalyst (Q-5) [1]. All other chemicals were of reagent grade and used without any further purification. Diborylbenzene **5** was prepared by the reported procedure [2].

### *Crystallography*

Single crystals of  $\text{N}_3$ -[6]CMP (**3a**) and  $\text{N}_4$ -[8]CMP (**3b**) suitable for X-ray crystallographic analysis were obtained by slowly diffusing hexane vapor into a  $\text{CHCl}_3/\text{MeOH}$  (10:1) solution of **3a** and **3b** at 25  $^\circ\text{C}$ . A single crystal was mounted on a thin polymer tip with cryoprotectant oil and was subjected to the X-ray diffraction studies as follows. The X-ray diffraction experiment was performed on a Rigaku XtaLAB P200 diffractometer equipped with a PILATUS200K area detector using multi-layer mirror monochromated  $\text{Cu K}\alpha$  radiation.

### *IAM refinements by SHELX*

The crystal structures of **3a** and **3b** were first solved by a conventional method adopting spherical, independent atom models (IAM) [3]. The initial structures were solved by the direct method with the SHELXT program [4] and refined by full-matrix least-squares on  $F^2$  using the SHELXL program suite [5]. The non-hydrogen atoms were analyzed anisotropically, and hydrogen atoms were located at the calculated positions and refined with a riding model. The refinement data are summarized in Tables S1 and S2.

**Table S1:** Crystal data of N<sub>3</sub>-[6]CMP (**3a**) with the IAM refinements by SHELX

|                                                     |                                                                 |                        |
|-----------------------------------------------------|-----------------------------------------------------------------|------------------------|
| CCDC                                                | 2335441                                                         |                        |
| Empirical formula                                   | C <sub>33</sub> H <sub>21</sub> N <sub>3</sub>                  |                        |
| Formula weight                                      | 459.53                                                          |                        |
| Temperature                                         | 93(2) K                                                         |                        |
| Wavelength                                          | 1.54184 Å                                                       |                        |
| Crystal system                                      | Triclinic                                                       |                        |
| Space group                                         | <i>P</i> -1                                                     |                        |
| Unit cell dimensions                                | <i>a</i> = 5.8332(12) Å                                         | <i>α</i> = 79.684(13)° |
|                                                     | <i>b</i> = 9.0678(16) Å                                         | <i>β</i> = 89.420(16)° |
|                                                     | <i>c</i> = 21.492(4) Å                                          | <i>γ</i> = 83.71(2)°   |
| Volume                                              | 1111.6(4) Å <sup>3</sup>                                        |                        |
| <i>Z</i>                                            | 2                                                               |                        |
| Density (calculated)                                | 1.373 mg/m <sup>3</sup>                                         |                        |
| Absorption coefficient                              | 0.630 mm <sup>-1</sup>                                          |                        |
| <i>F</i> (000)                                      | 480                                                             |                        |
| Crystal size                                        | 0.10 × 0.04 × 0.03 mm <sup>3</sup>                              |                        |
| Theta range for data collection                     | 2.090° to 68.218°                                               |                        |
| Index ranges                                        | -7 ≤ <i>h</i> ≤ 6, -10 ≤ <i>k</i> ≤ 10, -25 ≤ <i>l</i> ≤ 25     |                        |
| Reflections collected                               | 14564                                                           |                        |
| Independent reflections                             | 3942 [ <i>R</i> (int) = 0.0294]                                 |                        |
| Absorption correction                               | multi-scan                                                      |                        |
| Refinement method                                   | Full-matrix least-squares on <i>F</i> <sup>2</sup>              |                        |
| Data / restraints / parameters                      | 3942 / 0 / 325                                                  |                        |
| Goodness-of-fit on <i>F</i> <sup>2</sup>            | 1.053                                                           |                        |
| Final <i>R</i> indices [ <i>I</i> > 2σ( <i>I</i> )] | <i>R</i> <sub>1</sub> = 0.0386, <i>wR</i> <sub>2</sub> = 0.1066 |                        |
| <i>R</i> indices (all data)                         | <i>R</i> <sub>1</sub> = 0.0487, <i>wR</i> <sub>2</sub> = 0.1169 |                        |

**Table S2.** Crystal data of N<sub>4</sub>-[8]CMP (**3b**) with the IAM refinements by SHELX

|                   |                                                                   |
|-------------------|-------------------------------------------------------------------|
| CCDC              | 2335442                                                           |
| Empirical formula | C <sub>44</sub> H <sub>28</sub> N <sub>4</sub> •CHCl <sub>3</sub> |
| Formula weight    | 732.07                                                            |
| Temperature       | 93(2) K                                                           |
| Wavelength        | 1.54184 Å                                                         |

|                                                     |                                                                 |                           |
|-----------------------------------------------------|-----------------------------------------------------------------|---------------------------|
| Crystal system                                      | Monoclinic                                                      |                           |
| Space group                                         | <i>C2/c</i>                                                     |                           |
| Unit cell dimensions                                | $a = 23.783(15) \text{ \AA}$                                    | $\alpha = 90^\circ$       |
|                                                     | $b = 5.771(3) \text{ \AA}$                                      | $\beta = 108.62(2)^\circ$ |
|                                                     | $c = 26.322(15) \text{ \AA}$                                    | $\gamma = 90^\circ$       |
| Volume                                              | 3424(3) $\text{\AA}^3$                                          |                           |
| Z                                                   | 4                                                               |                           |
| Density (calculated)                                | 1.420 mg/m <sup>3</sup>                                         |                           |
| Absorption coefficient                              | 2.743 mm <sup>-1</sup>                                          |                           |
| <i>F</i> (000)                                      | 1512                                                            |                           |
| Crystal size                                        | 0.18 × 0.03 × 0.02 mm <sup>3</sup>                              |                           |
| Theta range for data collection                     | 3.923° to 70.629°                                               |                           |
| Index ranges                                        | -28 ≤ <i>h</i> ≤ 26, -7 ≤ <i>k</i> ≤ 6, -32 ≤ <i>l</i> ≤ 32     |                           |
| Reflections collected                               | 14509                                                           |                           |
| Independent reflections                             | 3202 [ <i>R</i> (int) = 0.0530]                                 |                           |
| Absorption correction                               | multi-scan                                                      |                           |
| Refinement method                                   | Full-matrix least-squares on <i>F</i> <sup>2</sup>              |                           |
| Data / restraints / parameters                      | 3202 / 0 / 243                                                  |                           |
| Goodness-of-fit on <i>F</i> <sup>2</sup>            | 1.082                                                           |                           |
| Final <i>R</i> indices [ <i>I</i> > 2σ( <i>I</i> )] | <i>R</i> <sub>1</sub> = 0.0805, <i>wR</i> <sub>2</sub> = 0.1999 |                           |
| <i>R</i> indices (all data)                         | <i>R</i> <sub>1</sub> = 0.0932, <i>wR</i> <sub>2</sub> = 0.2071 |                           |

### X-ray charge density analysis by XD-2016

For elucidating the difference of the electronic properties by nitrogen doping, crystallographic data of N<sub>3</sub>-[6]CMP (**3a**) and [6]CMP (CCDC 1015816) [6] were subjected to X-ray charge density analyses. The SHELXL-refined structures and the HKL data were transferred to the XD-2016 program [7]. The structures were first converged by the IAM refinement with the XDLSM module in XD-2016. The resultant *R* factors were as follows:

$$R(F) = 0.0382 \text{ and } R_w(F) = 0.0573 \text{ for } \mathbf{3a};$$

$$R(F) = 0.0361 \text{ and } R_w(F) = 0.0460 \text{ for [6]CMP.}$$

Then, the data were refined by the aspherical model by adopting the transferable aspherical atom model (TAAM) [8] with the parameters of the University at Buffalo Pseudoatom Databank (UBDB) [9,10]. The significant improvement of the refinement was found with the deformation map ( $F_1 - F_2$ ) and *R* factors:

$$R(F) = 0.0269 \text{ and } R_w(F) = 0.0430 \text{ for } \mathbf{3a};$$

$$R(F) = 0.0237 \text{ and } R_w(F) = 0.0312 \text{ for [6]CMP.}$$

The refinement data of X-ray charge density analyses of **3a** and [6]CMP are summarized in Tables S3 and S4.

**Table S3:** Crystal data of N<sub>3</sub>-[6]CMP (**3a**) with the TAAM/UBDB refinements by XD-2016

|                                 |                                                |                             |
|---------------------------------|------------------------------------------------|-----------------------------|
| CCDC                            | 2335443                                        |                             |
| Empirical formula               | C <sub>33</sub> H <sub>21</sub> N <sub>3</sub> |                             |
| Formula weight                  | 459.53                                         |                             |
| Temperature                     | 93(2) K                                        |                             |
| Wavelength                      | 1.54184 Å                                      |                             |
| Crystal system                  | Triclinic                                      |                             |
| Space group                     | <i>P</i> -1                                    |                             |
| Unit cell dimensions            | $a = 5.8332(12)$ Å                             | $\alpha = 79.684(13)^\circ$ |
|                                 | $b = 9.0678(16)$ Å                             | $\beta = 89.420(16)^\circ$  |
|                                 | $c = 21.492(4)$ Å                              | $\gamma = 83.71(2)^\circ$   |
| Volume                          | 1111.6(4) Å <sup>3</sup>                       |                             |
| <i>Z</i>                        | 2                                              |                             |
| Density (calculated)            | 1.373 mg/m <sup>3</sup>                        |                             |
| Absorption coefficient          | 0.630 mm <sup>-1</sup>                         |                             |
| <i>F</i> (000)                  | 480                                            |                             |
| Crystal size                    | 0.10 × 0.04 × 0.03 mm <sup>3</sup>             |                             |
| Theta range for data collection | 2.090° to 68.218°                              |                             |



|                                        |                                                            |
|----------------------------------------|------------------------------------------------------------|
| Index ranges                           | $-7 \leq h \leq 6, -10 \leq k \leq 10, -25 \leq l \leq 25$ |
| Reflections collected                  | 14568                                                      |
| Independent reflections                | 3945 [ $R(\text{int}) = 0.0294$ ]                          |
| Absorption correction                  | multi-scan                                                 |
| Refinement method                      | Full-matrix least-squares on $F$                           |
| Data / restraints / parameters         | 3228 / 0 / 346                                             |
| Goodness-of-fit                        | 2.24                                                       |
| Final $R$ indices [ $I > 2\sigma(I)$ ] | $R(F) = 0.0269, R_w(F) = 0.0430$                           |
| $R$ indices (all data)                 | $R(F^2) = 0.0391, R_w(F^2) = 0.1138$                       |

**Table S4:** Crystal data of [6]CMP with the TAAM/UBDB refinements by XD-2016

|                                 |                                                            |                          |
|---------------------------------|------------------------------------------------------------|--------------------------|
| CCDC                            | 2335444                                                    |                          |
| Empirical formula               | $\text{C}_{36}\text{H}_{24}$                               |                          |
| Formula weight                  | 465.55                                                     |                          |
| Temperature                     | 90(2) K                                                    |                          |
| Wavelength                      | 1.54178 Å                                                  |                          |
| Crystal system                  | Monoclinic                                                 |                          |
| Space group                     | $P2_1/c$                                                   |                          |
| Unit cell dimensions            | $a = 12.289(3)$ Å                                          | $\alpha = 90^\circ$      |
|                                 | $b = 15.382(3)$ Å                                          | $\beta = 99.35(3)^\circ$ |
|                                 | $c = 6.0239(12)$ Å                                         | $\gamma = 90^\circ$      |
| Volume                          | 1123.6(4) Å <sup>3</sup>                                   |                          |
| $Z$                             | 2                                                          |                          |
| Density (calculated)            | 1.394 mg/m <sup>3</sup>                                    |                          |
| Absorption coefficient          | 0.579 mm <sup>-1</sup>                                     |                          |
| $F(000)$                        | 480                                                        |                          |
| Crystal size                    | 0.20 × 0.05 × 0.05 mm <sup>3</sup>                         |                          |
| Theta range for data collection | 3.65° to 67.33°                                            |                          |
| Index ranges                    | $-12 \leq h \leq 14, -18 \leq k \leq 18, -7 \leq l \leq 7$ |                          |
| Reflections collected           | 8005                                                       |                          |
| Independent reflections         | 1755 [ $R(\text{int}) = 0.0371$ ]                          |                          |
| Absorption correction           | none                                                       |                          |
| Refinement method               | Full-matrix least-squares on $F$                           |                          |
| Data / restraints / parameters  | 1755 / 0 / 175                                             |                          |
| Goodness-of-fit                 | 1.485                                                      |                          |

|                                        |                                      |
|----------------------------------------|--------------------------------------|
| Final $R$ indices [ $I > 2\sigma(I)$ ] | $R(F) = 0.0237, R_w(F) = 0.0312$     |
| $R$ indices (all data)                 | $R(F^2) = 0.0417, R_w(F^2) = 0.0610$ |

### *Visualization and analyses*

Molecular structures were visualized and analyzed by Mercury CSD 4.1.0 [11] and UCSF Chimera (ver. 1.13.1) [12]. The electron densities after the TAAM/XD2016 refinements were visualized by MoleCoolQt [13]. The contour map of the deformation density was obtained by the XDGRAPH module in the XD2016 package [7], and the ESP maps were generated by MolIso [14]. All the crystallographic data were deposited in the Cambridge Crystallographic Data Centre (CCDC 2335441-2335443). The data can be obtained free of charge from The Cambridge Crystallographic Data Centre via [www.ccdc.cam.ac.uk/data\\_request/cif](http://www.ccdc.cam.ac.uk/data_request/cif).

# Spectra

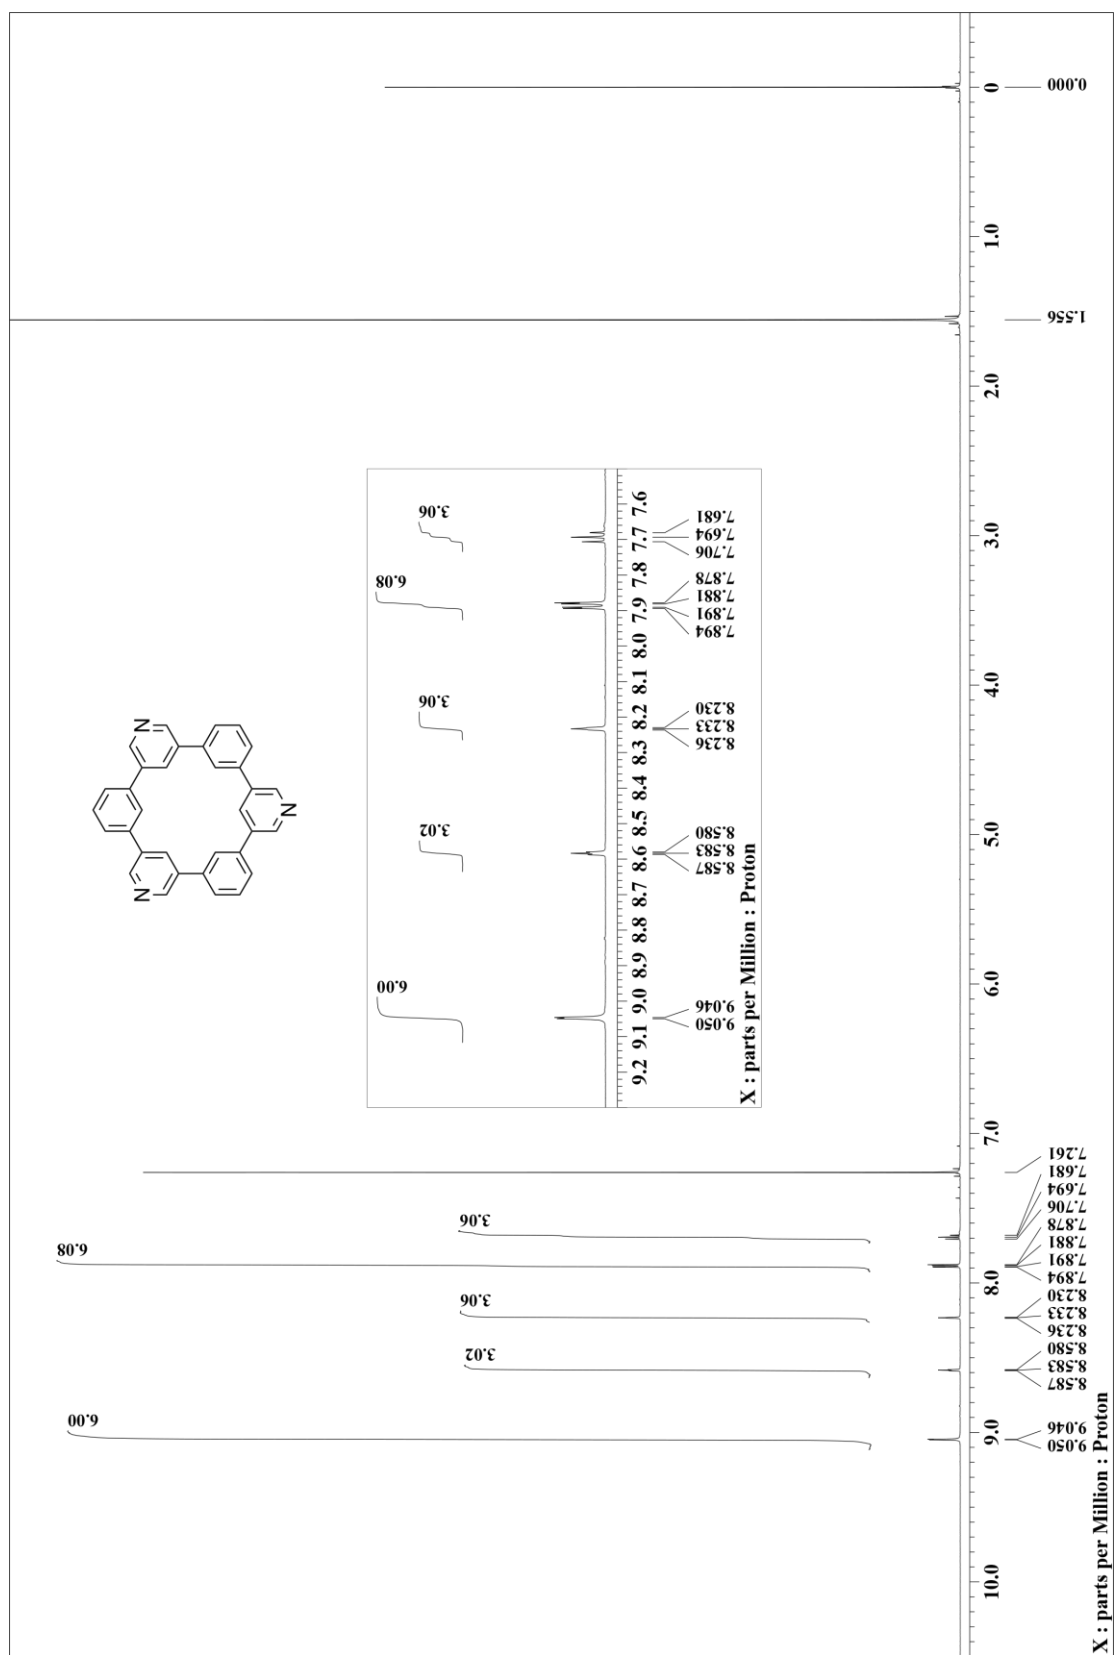

Figure S4: <sup>1</sup>H NMR spectrum of N<sub>3</sub>-[6]CMP (3a) (CDCl<sub>3</sub>, 25 °C, 600 MHz).

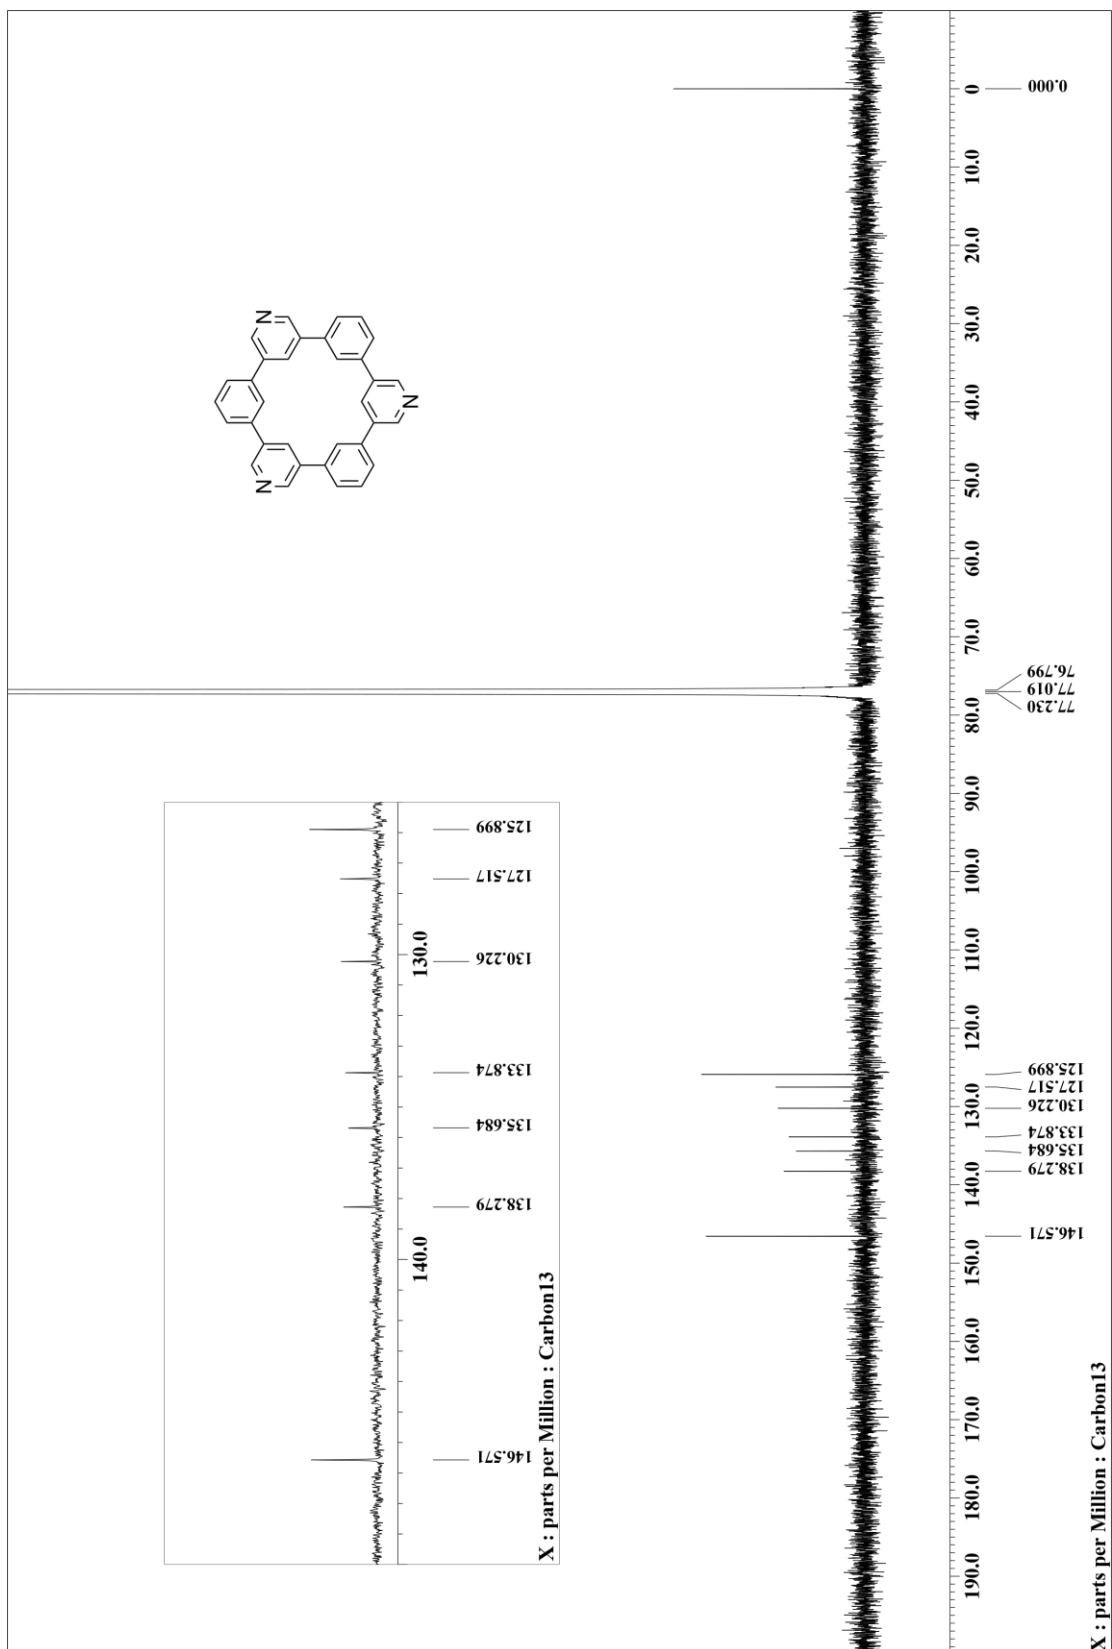

**Figure S5:**  $^{13}\text{C}$  NMR spectrum of  $\text{N}_3$ -[6]CMP (**3a**) ( $\text{CDCl}_3$ , 25 °C, 151 MHz).

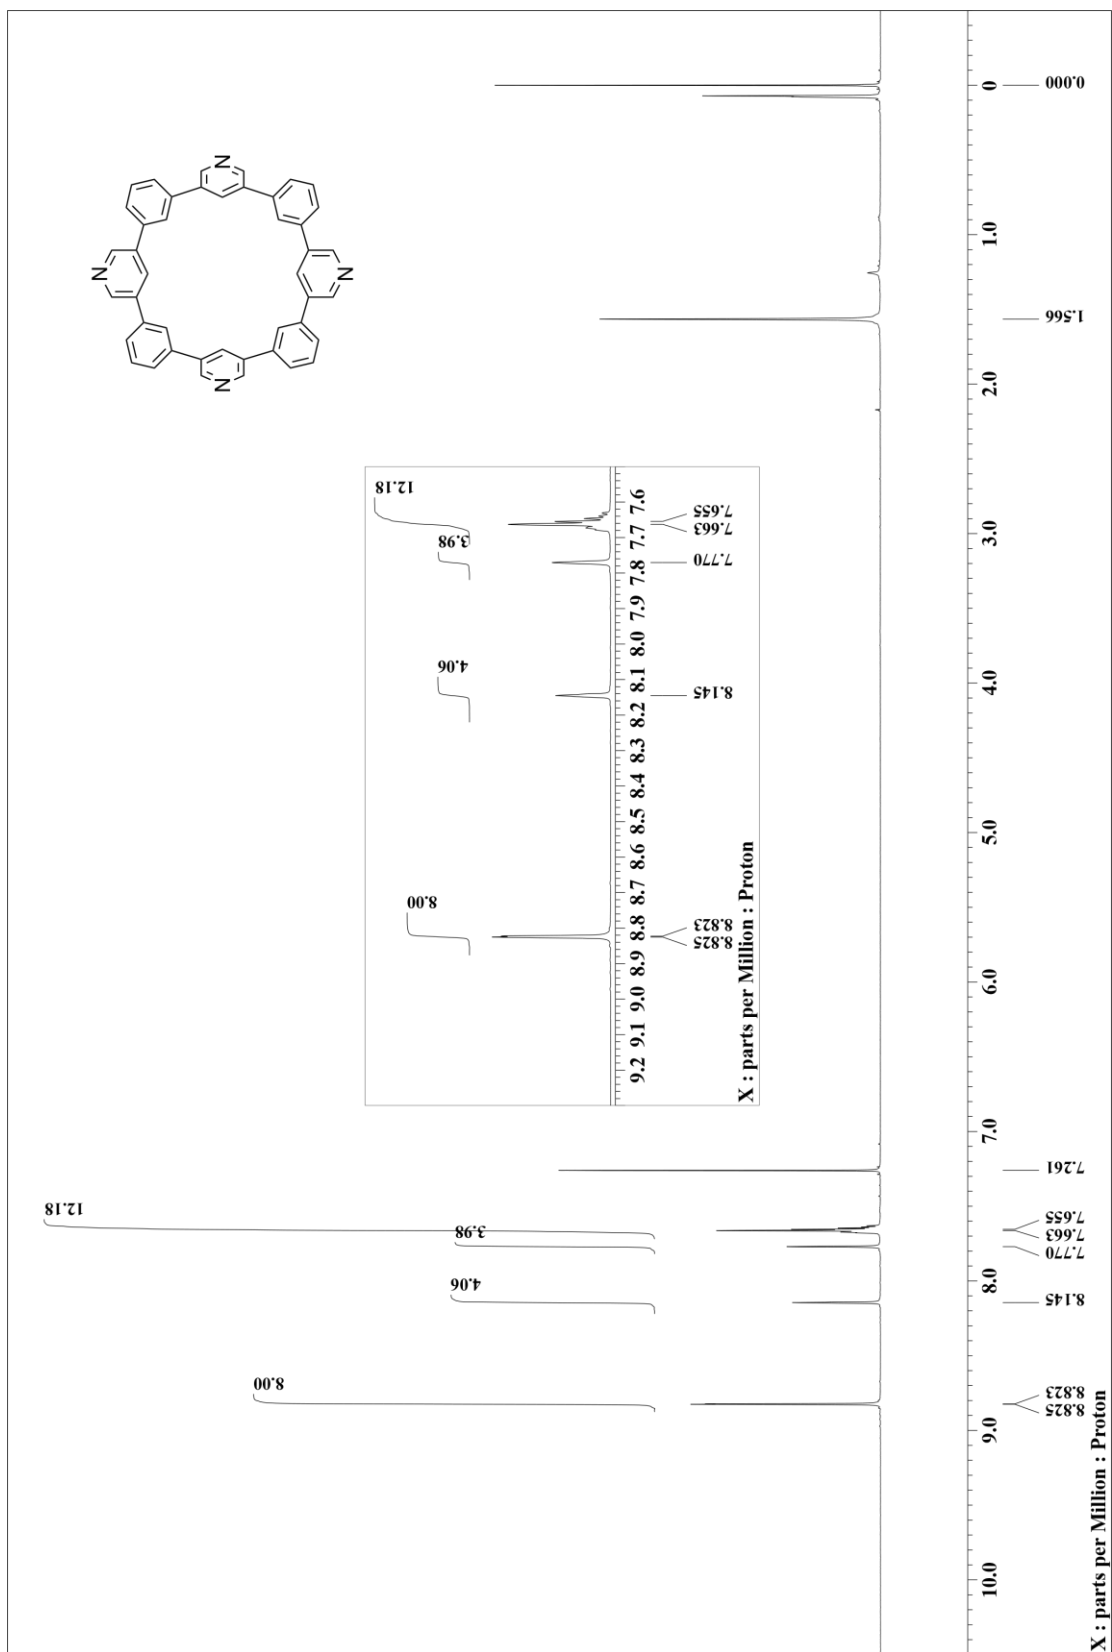

**Figure S6:**  $^1\text{H}$  NMR spectrum of  $N_4$ -[8]CMP (**3b**) ( $\text{CDCl}_3$ , 25 °C, 600 MHz).

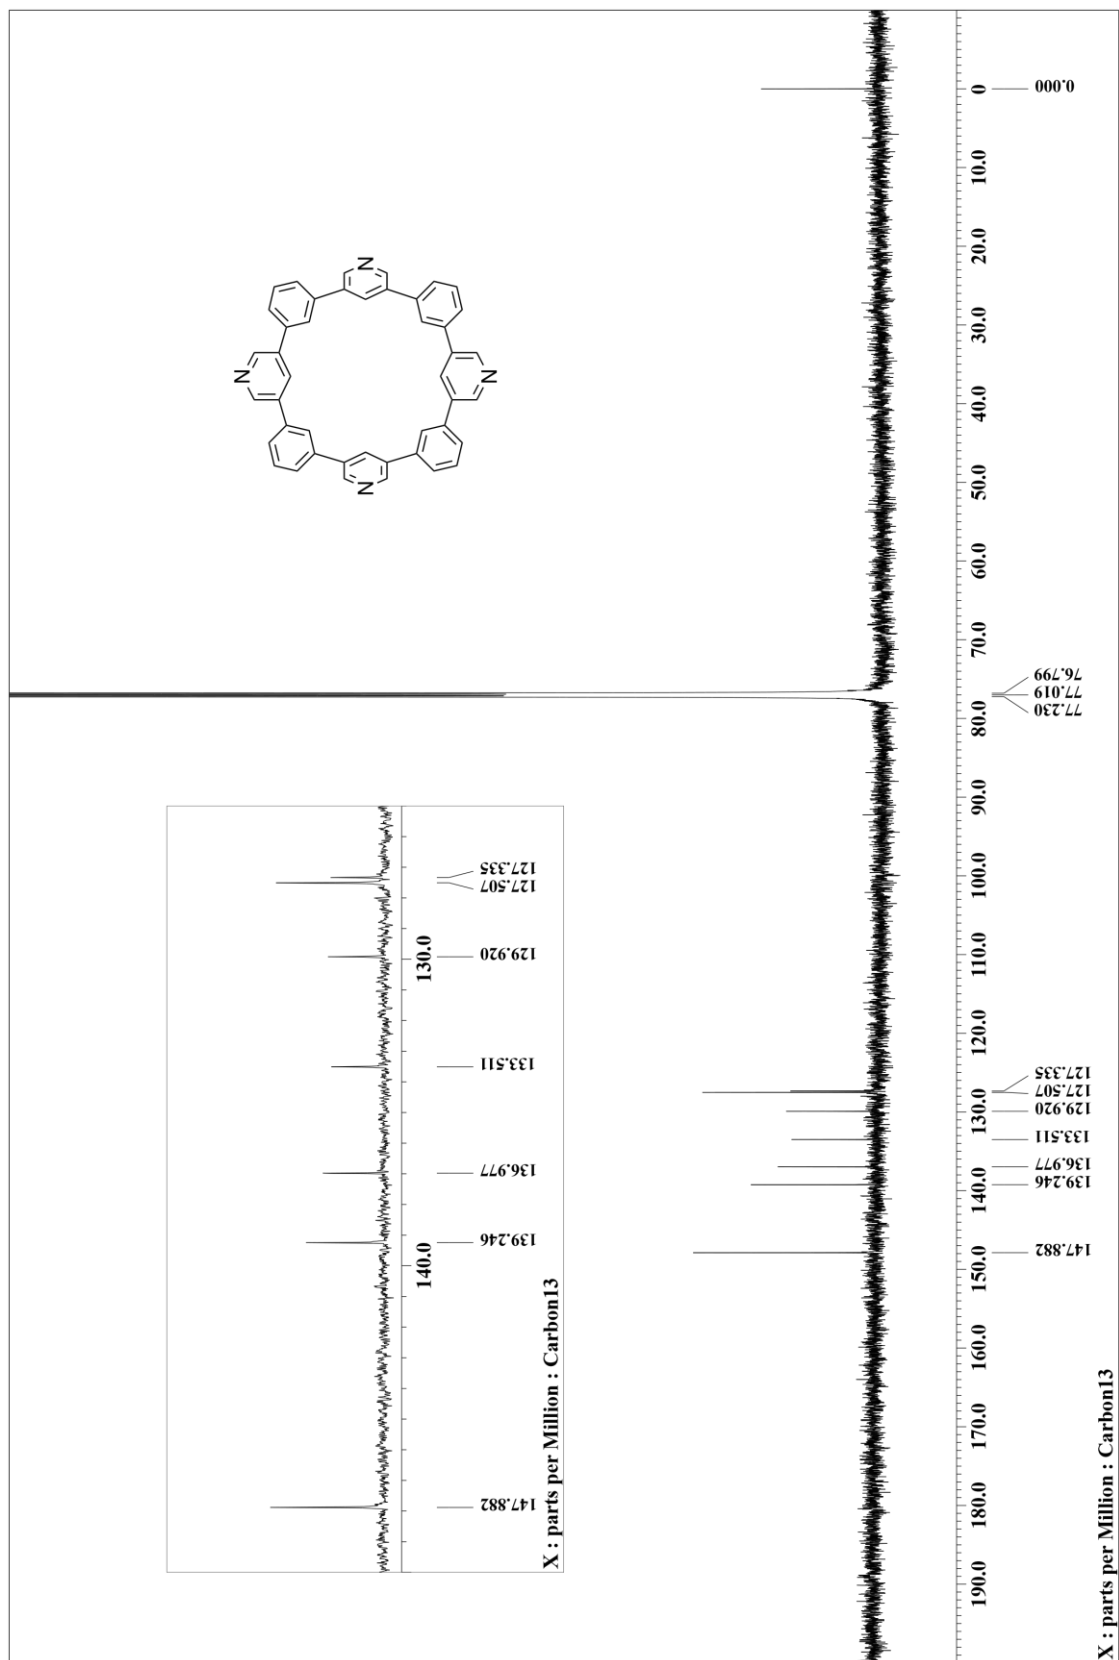

**Figure S7:**  $^{13}\text{C}$  NMR spectrum of  $\text{N}_4$ -[8]CMP (**3b**) ( $\text{CDCl}_3$ , 25 °C, 151 MHz).

## Supplementary references

1. Pangborn, A. B.; Giardello, M. A.; Grubbs, R. H.; Rosen, R. K.; Timmers, F. J. *Organometallics* **1996**, *15*, 1518-1520.
2. Sun, Z.; Ikemoto, K.; Fukunaga, T. M.; Koretsune, T.; Arita, R.; Sato, S.; Isobe, H. *Science* **2019**, *363*, 151-155.
3. Doyle, P. A.; Turner, P. S. *Acta Crystallogr. A* **1968**, *24*, 390-397.
4. Sheldrick, G. M. *Acta Crystallogr. A* **2015**, *71*, 3-8.
5. Sheldrick, G. M. *Acta Crystallogr. C* **2015**, *71*, 3-8.
6. Xue, J. Y.; Ikemoto, K.; Takahashi, N.; Izumi, T.; Taka, H.; Kita, H.; Sato, S.; Isobe, H. *J. Org. Chem.* **2014**, *79*, 9735-9739.
7. Volkov, A.; Macchi, P.; Farrugia, L. J.; Gatti, C.; Mallinson, P.; Rihter, T.; Koritsánszky, T. *XD2016, a computer program package for multipole refinement, topological analysis of charge densities and evaluation of intermolecular energies from experimental and theoretical structure factors*; University at Buffalo; State University of New York; University of Milano; University of Glasgow; CNR-ISTM; Middle Tennessee State University, 2016.
8. Brock, C. P.; Dunitz, J. D.; Hirshfeld, F. L. *Acta Crystallogr. B* **1991**, *47*, 789-797.
9. Koritsánszky, T.; Volkov, A.; Coppens, P. *Acta Crystallogr. A* **2002**, *58*, 464-472.
10. Dominiak, P. M.; Volkov, A.; Li, X.; Messerschmidt, M.; Coppens, P. *J. Chem. Theory Comput.* **2007**, *3*, 232-247.
11. Macrae, C. F.; Bruno, I. J.; Chisholm, J. A.; Edgington, P. R.; McCabe, P.; Pidcock, E.; Rodriguez-Monge, L.; Taylor, R.; van de Streek, J.; Wood, P. A. *J. Appl. Cryst.* **2008**, *41*, 466-470.
12. Pettersen, E. F.; Goddard, T. D.; Huang, C. C.; Couch, G. S.; Greenblatt, D. M.; Meng, E. C.; Ferrin, T. E. *J. Comput. Chem.* **2004**, *13*, 1605-1612.
13. Hübschle, C. B.; Dittrich, B. *J. Appl. Cryst.* **2011**, *44*, 238-240.
14. Hübschle, C. B.; Luger, P. *J. Appl. Cryst.* **2006**, *39*, 901-904.
